# Supplementary material for: Highly active NiFe LDH anchoring on cobalt carbonate hydroxide for efficient electrocatalytic 5-hydroxymethylfurfural oxidation towards 2,5-furandicarboxylic acid
Source: Royal Society of Chemistry journal article supplement (doi:10.1039/d3nj01836a), 2023-01-01
Supplement: d3nj01836a1.pdf [file d3nj01836a1.pdf]

## Supplementary Information

# Highly Active NiFe LDH anchoring on Cobalt Carbonate Hydroxide for Efficient Electrocatalytic 5-hydroxymethylfurfural oxidation towards 2,5-furandicarboxylic acid

Lintang Dhanasmoro<sup>a</sup> and Oi Lun Li<sup>\*a</sup>

<sup>a</sup>School of Materials Science and Engineering, Pusan National University,  
Busan 46241, South Korea

**E-mail:** [helenali@pusan.ac.kr](mailto:helenali@pusan.ac.kr)

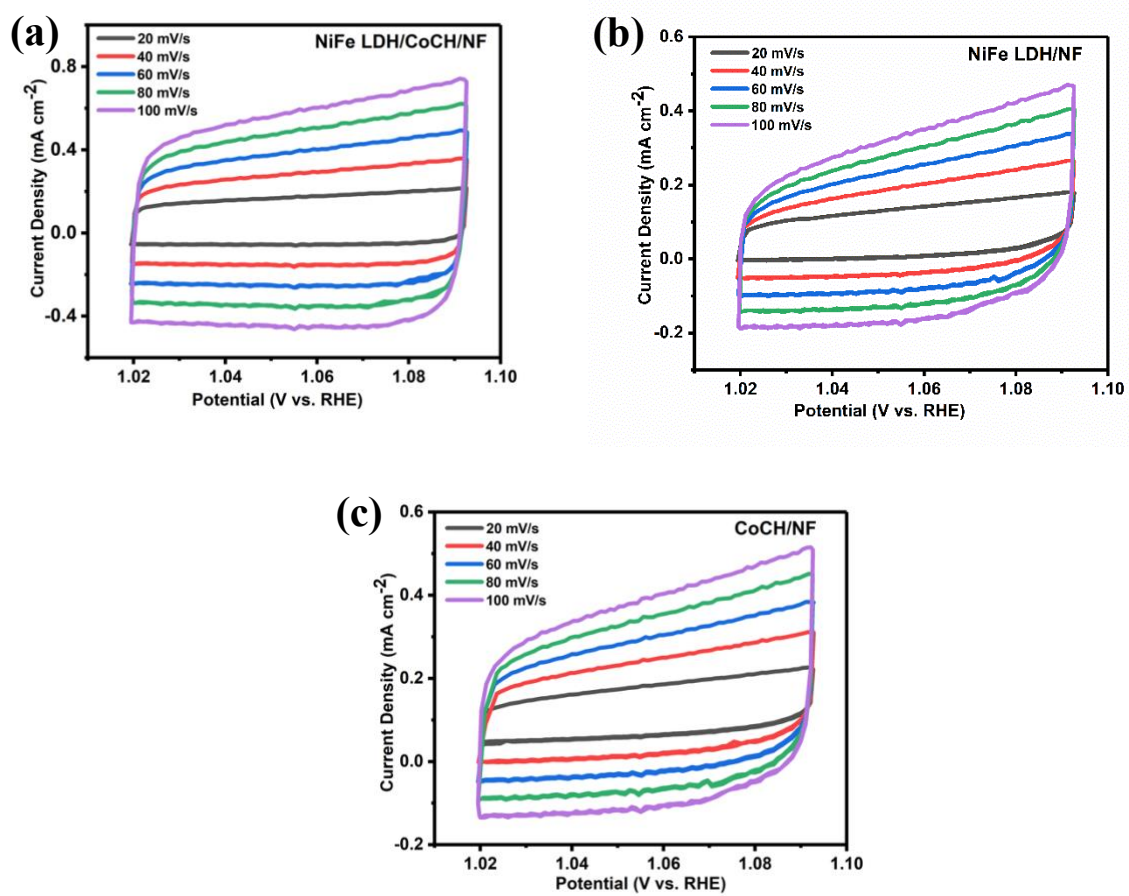

**Figure S1.** Cyclic voltammety curves of different catalysts in 5 mM HMF solution with different sweep speeds

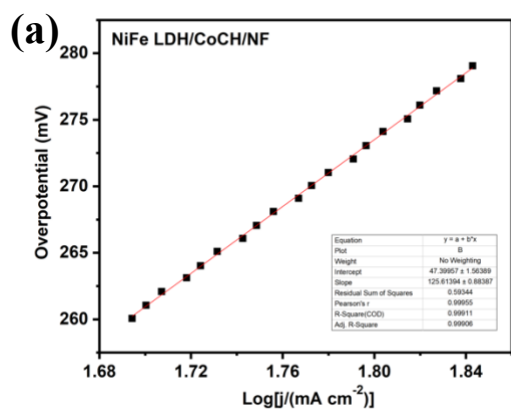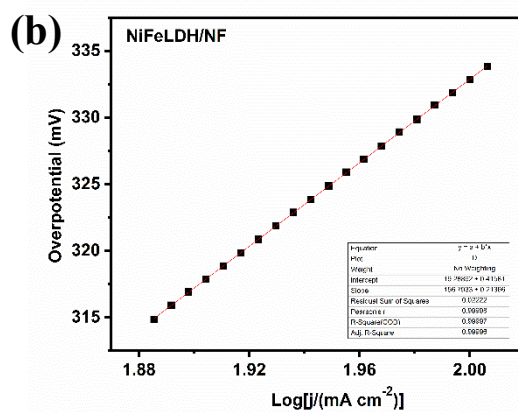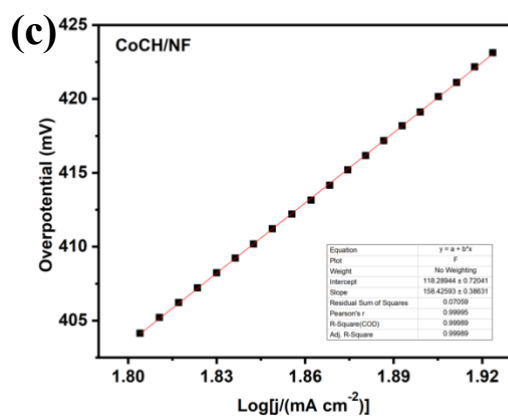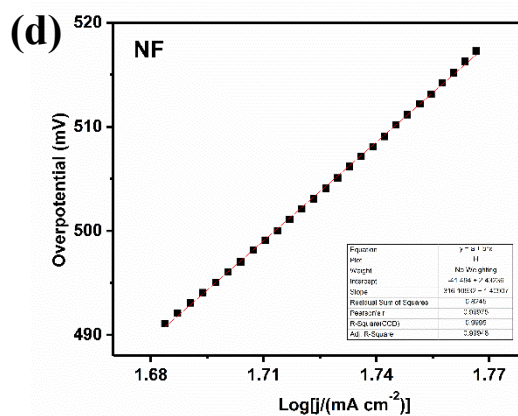

**Figure S2.** Tafel plot of NiFe LDH/CoCH/NF and other catalysts in 5 mM HMF solution.

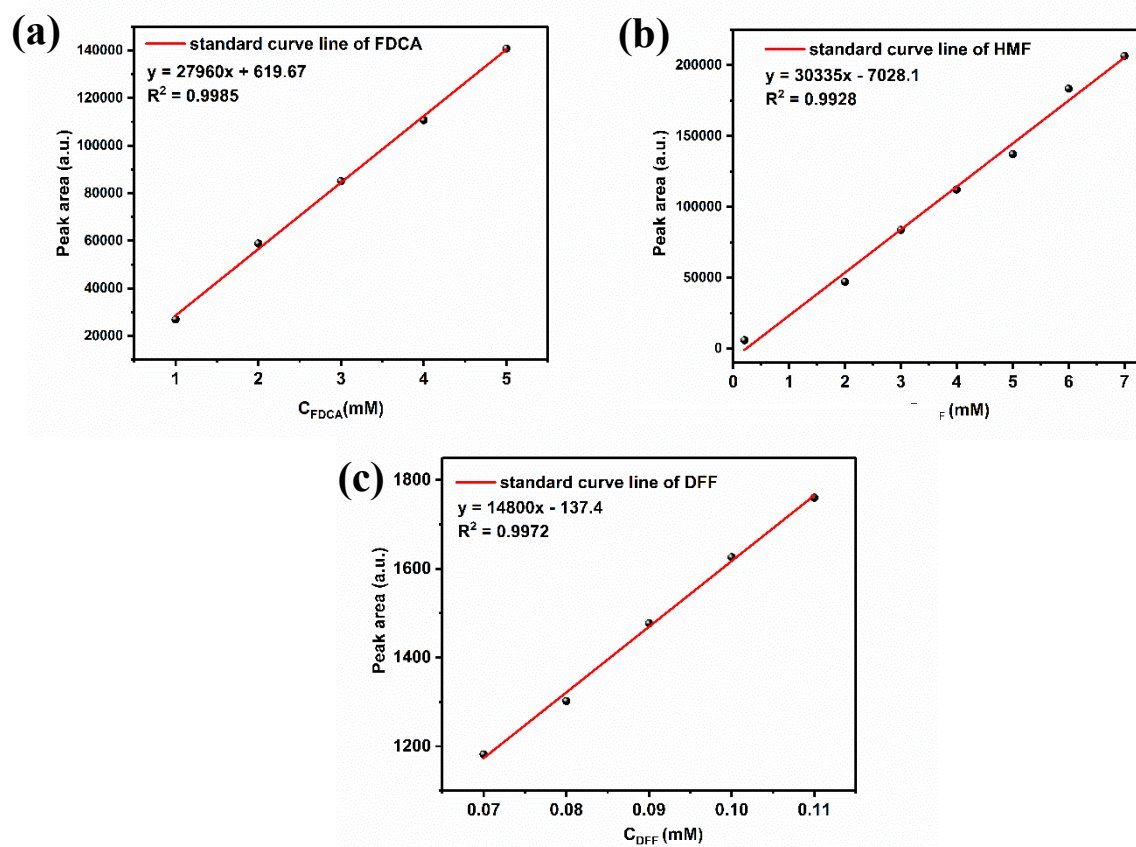

Figure S3. HPLC Calibration curves of (a) FDCA, (b) HMF, and (c) DFF.

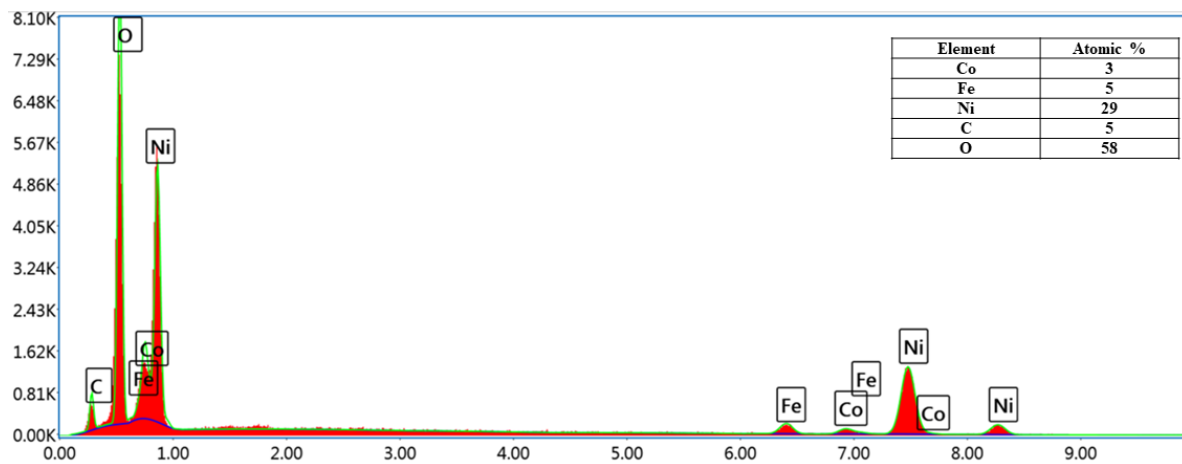

**Figure S4.** EDX result of the NiFe LDH/CoCH/NF sample.

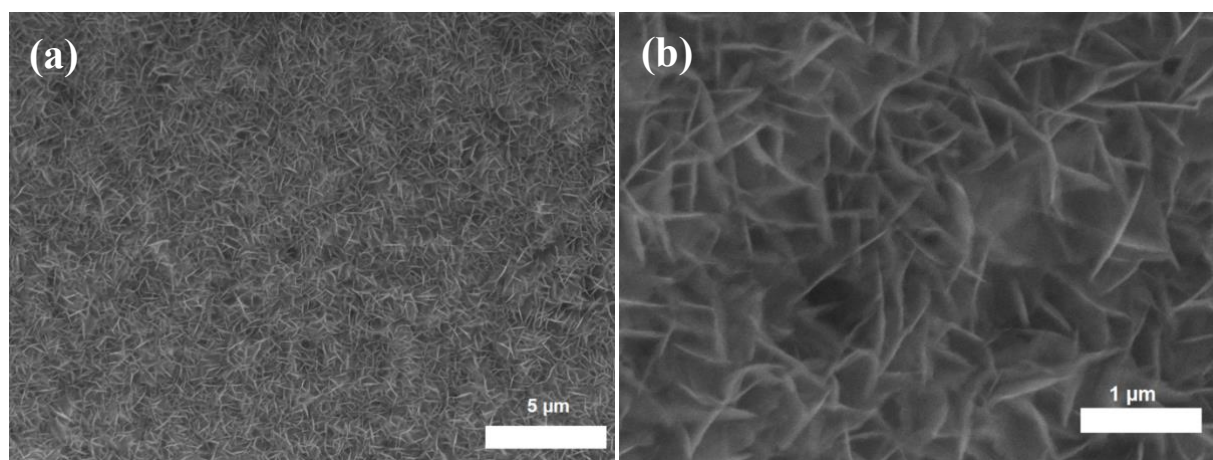

**Figure S5.** SEM images of NiFe LDH/CoCH/NF at low and high magnifications after 5 cycles of electrolytic HMF oxidations

**Table S1.** The values of Cdl and ECSA for of different catalysts in 5 mM HMF

| Catalyst         | Cdl (mF cm <sup>-2</sup> ) | ECSA(cm <sup>2</sup> ) |
|------------------|----------------------------|------------------------|
| NiFe LDH/CoCH/NF | 10                         | 250                    |
| NiFe LDH/NF      | 4.8                        | 120                    |
| CoCH/NF          | 4.6                        | 115                    |

**Table S2.** Comparison of the NiFe LDH/CoCH/NF with other reported catalysts for electrocatalytic oxidation of HMF in alkaline electrolytes.

| Catalyst                                              | Electrolyte          | Reaction time (min) | FDCA yield (%) | Faradaic Efficiency (%) | Ref.      |
|-------------------------------------------------------|----------------------|---------------------|----------------|-------------------------|-----------|
| NiFe LDH/CoCH/NF                                      | 1 M KOH + 5 mM HMF   | 90                  | 98.6           | 98.1                    | This work |
| d-NiFe LDH/CP                                         | 1 M NaOH + 10 mM HMF | 300                 | 96.8           | 84.5                    | [1]       |
| NiCoFe LDHs                                           | 1 M NaOH + 10 mM HMF | 60                  | 84.9           | 90                      | [2]       |
| NiFe LDH                                              | 1 M KOH + 10 mM HMF  | 90                  | 98             | 99.4                    | [3]       |
| NiCoMn-LDHs/NF                                        | 1 M NaOH + 1 mM HMF  | 150                 | 91.7           | 65                      | [4]       |
| CoP-CoOOH                                             | 1M KOH + 150 mM HMF  | 1000                | 96.3           | 96.3                    | [5]       |
| CoOOH                                                 | 1 M KOH + 5 mM HMF   | 1320                | 35.1           | 35.1                    | [6]       |
| NiCO <sub>2</sub> O <sub>4</sub> /NF                  | 1M KOH + 5mM HMF     | 55                  | 90.8           | 87.5                    | [7]       |
| N-NiMoO <sub>4</sub> /NF                              | 1M KOH + 10mM HMF    | 120                 | 97             | 91                      | [8]       |
| Ni <sub>2</sub> S <sub>3</sub> /NF                    | 1M KOH + 10mM HMF    | 120                 | 98             | 94                      | [9]       |
| S-Ni@C                                                | 1M KOH + 10mM HMF    | 270                 | 96             | 96                      | [10]      |
| NiO-N/C                                               | 1M KOH + 10mM HMF    | 120                 | 84             | 96                      | [11]      |
| Ni <sub>0.9</sub> Cu <sub>0.1</sub> (OH) <sub>2</sub> | 1M KOH + 5mM HMF     | 120                 | 91.2           | 91.2                    | [12]      |

## References

1. Y.-F. Qi, K.-Y. Wang, Y. Sun, J. Wang and C. Wang, *ACS Sustain. Chem. Eng.*, 2021, 10, 645-654.
2. M. Zhang, Y. Liu, B. Liu, Z. Chen, H. Xu and K. Yan, *ACS Catal.*, 2020, 10, 5179-5189.
3. W.-J. Liu, L. Dang, Z. Xu, H.-Q. Yu, S. Jin and G. W. Huber, *ACS Catal.*, 2018, 8, 5533-5541.
4. B. Liu, S. Xu, M. Zhang, X. Li, D. Decarolis, Y. Liu, Y. Wang, E. K. Gibson, C. R. A. Catlow and K. Yan, *Green Chem.*, 2021, 23, 4034-4043.
5. H. Wang, Y. Zhou and S. Tao, *Appl. Catal. B: Environ.*, 2022, 315.
6. B. J. Taitt, D.-H. Nam and K.-S. Choi, *ACS Catal.*, 2018, 9, 660-670.
7. M. J. Kang, H. Park, J. Jegal, S. Y. Hwang, Y. S. Kang and H. G. Cha, *Appl. Catal. B: Environ.*, 2019, 242, 85-91.
8. W. Wang and M. Wang, *Catal. Sci. Technol.*, 2021, 11, 7326-7330.
9. W. Wang, F. Kong, Z. Zhang, L. Yang and M. Wang, *Dalton Trans.*, 2021, 50, 10922-10927.
10. F. Kong and M. Wang, *ACS Appl. Energy Mater.*, 2021, 4, 1182-1188.
11. W. Wang, Z. Zhang and M. Wang, *Biomass Convers. Biorefinery*, 2022, 1-8.
12. J. Zhang, P. Yu, G. Zeng, F. Bao, Y. Yuan and H. Huang, *J. Mater. Chem. A*, 2021, 9, 9685-9691.
